# Supplementary material
Source: PubMed Central journal article supplement (PMC2664043)
Supplement: 0811664106_Appendix_PDF.pdf [file 0811664106_Appendix_PDF.pdf]

## **Supporting Information**

For: Longrich and Currie, “A microraptorine (Dinosauria- Dromaeosauridae) from the Late Cretaceous of North America”

**Supporting Information 1.** Dinosaur mass data and equations

**Supporting Information 2.** Specimen data

**Supporting Information 3.** Taxa and characters

**Supporting Information 4.** Data matrix

## Supporting Information 1. Dinosaur mass data and equations

**Table 1. Body masses and pubis lengths used for mass estimate**

| Taxon                              | Specimen    | Pubis, mm | Reference  | Mass, g | Reference                 |
|------------------------------------|-------------|-----------|------------|---------|---------------------------|
| <i>Archaeopteryx recurva</i>       | JM 2257     | 23        | this study | 69      | (2)                       |
| <i>Archaeopteryx lithographica</i> | HMN 1880    | 41        | this study | 252     | (3)                       |
| <i>Microraptor gui</i>             | IVPP V13352 | 67.2      | this study | 600     | GS Paul, unpublished data |
| <i>Bambiraptor feinbergorum</i>    | AMNH 30556  | 107       | this study | 2100    | GS Paul, unpublished data |
| <i>Sinornithosaurus millennii</i>  | IVPP 12811  | 120       | this study | 3000    | GS Paul, unpublished data |
| <i>Velociraptor mongoliensis</i>   | IGM 100/986 | 213       | (1)        | 24000   | GS Paul, unpublished data |
| <i>Deinonychus antirrhopus</i>     | MCZ 4371    | 437       | This study | 73000   | (2)                       |

**Notes:**

*Institutional abbreviations*— AMNH; American Museum of Natural History, New York, New York; HMN, Humboldt Museum fur Naturkunde, Berlin, Germany; IGM, Geological Institute, Ulan Bator, Mongolia; IVPP, Institute of Vertebrate Paleontology and Paleoanthropology, Beijing, China; JM, Jura Museum, Willibaldsburg, Germany; MCZ, Harvard Museum of Comparative Zoology, Cambridge, Massachusetts ; NMC/CMN, Canadian Museum of Nature, Ottawa, Canada; TMP, Royal Tyrrell Museum of Palaeontology, Drumheller, Canada; UALVP, University of Alberta Laboratory for Vertebrate Palaeontology, Edmonton, Canada.

*Methods*— Length of the pubis was measured from casts (JM 2257; HM 1880), from photographs of specimens using ImageJ image analysis software, or taken from the literature. When the data are  $\log_{10}$  transformed and mass is regressed against pubis length, the resulting equation is  $M = 2.4721L - 1.6062$ ;  $R^2 = .98674$ . The resulting allometric equation is:

$$M = 0.02476L^{2.4721}$$

Where  $M$  is mass in grams, and  $L$  is pubis length in mm. A pubis length of 95 mm therefore predicts a mass of 1918 g (4.2 lbs) for the holotype of *Hesperonychus elizabethae*.

**Table 2. Body mass of predatory theropods from the Dinosaur Park Formation**

| <b>Taxon</b>                       | <b>Specimen</b> | <b>Mass, kg</b> | <b>Reference</b>                                                              |
|------------------------------------|-----------------|-----------------|-------------------------------------------------------------------------------|
| <i>Daspletosaurus torosus</i>      | NMC/CMN 8505    | 3844            | (4)                                                                           |
| <i>Gorgosaurus libratus</i>        | AMNH 5458       | 2795            | (4)                                                                           |
| <i>Troodon inequalis</i>           | NMC/CMN 12340   | 142             | (5)                                                                           |
| <i>Dromaeosaurus albertensis</i>   | AMNH 5356       | 16.29           | (4)                                                                           |
| <i>Saurornitholestes langstoni</i> | TMP 88.121.39   | 12.8            | Estimated using equation 9 from reference(5) and femur circumference = 67.6mm |
| <i>Ricardoestesia gilmorei</i>     | NMC/CMN 343     | ?               | too incomplete for mass estimate                                              |
| <i>Hesperonychus elizabethae</i>   | UALVP 48778     | 1.9             | this study                                                                    |



## Supporting Information 2. Specimen data

**Table 3: Specimens of *Hesperonychus***

| Element            | Specimen         | Stratigraphy                                   | Locality                                      | Dimensions (mm) |
|--------------------|------------------|------------------------------------------------|-----------------------------------------------|-----------------|
| Pelvic girdle      | UALVP            | Belly River Group: Dinosaur Park Fm.           | E of DPP, Southern Alberta                    | 95              |
| Pedal phalanx II-1 | TMP 1989.116.65  | Belly River Group: Dinosaur Park Fm.           | Cripple Creek (near Onefour) Southern Alberta | 14.2            |
| Pedal phalanx II-1 | TMP 1966.19.22   | Belly River Group                              | Manyberries, Southern Alberta                 | incomplete      |
| Pedal phalanx II-1 | UALVP 50049      | Belly River Group: Upper Dinosaur Park Fm.     | Irvine Mammal Locality, Southern Alberta      | incomplete      |
| Pedal phalanx II-2 | TMP 1992.36.31   | Belly River Group                              | DPP, Southern Alberta                         | 11.1            |
| Pedal phalanx II-2 | TMP 1983.67.7    | Belly River Group                              | DPP, Southern Alberta                         | 17.1            |
| Pedal phalanx II-2 | TMP 1991.50.143  | Belly River Group                              | DPP, Southern Alberta                         | 4.8             |
| Pedal phalanx II-3 | TMP 1988.50.34   | Belly River Group                              | DPP, Southern Alberta                         | 4.8             |
| Pedal phalanx II-3 | TMP 1995.92.9    | Belly River Group: Oldman Fm. (DPF equivalent) | Devil's Coulee, Southern Alberta              | 5.6             |
| Pedal phalanx II-3 | TMP 1991.50.105  | Belly River Group: Dinosaur Park Fm.           | DPP, Southern Alberta                         | incomplete      |
| Pedal phalanx II-3 | TMP 1988.36.68   | Belly River Group: Dinosaur Park Fm.           | Steveville RR Grade, NW of DPP                | 5.42            |
| Pedal phalanx II-3 | TMP 1980.16.1880 | Belly River Group                              | DPP, Southern Alberta                         | 5.6             |
| Pedal phalanx II-3 | TMP 1980.8.205   | Belly River Group                              | DPP, Southern Alberta                         | 6.5             |
| Pedal phalanx II-3 | TMP 1990.107.15  | Belly River Group                              | Onefour, Southern Alberta                     | 6.6             |
| Pedal phalanx II-3 | TMP 1979.10.6    | Belly River Group                              | Sandy Point, Southern Alberta                 | incomplete      |
| Pedal phalanx II-3 | TMP 2000.12.100  | Belly River Group: Dinosaur Park Fm.           | DPP, Southern Alberta                         | 6.4             |
| Pedal phalanx II-3 | UALVP 50048      | Belly River Group: Upper Dinosaur Park Fm.     | Irvine Mammal Locality, Southern Alberta      | 4.8             |

### Notes:

*Institutional abbreviations*— TMP, Royal Tyrrell Museum of Palaeontology, Drumheller, Canada; UALVP, University of Alberta Laboratory for Vertebrate Palaeontology, Edmonton, Canada.

*Locality*— Most of the specimens described here (including the holotype) come from Dinosaur Provincial Park, Alberta, and nearby exposures along the Red Deer River. Seven referred

specimens come from other areas of Alberta; none of these are more than 200km from Dinosaur Park (SI Figure 1).

*Stratigraphy*— All specimens for which precise stratigraphic data are available come from the chronostratigraphic interval bounded by the Dinosaur Park Formation and coeval beds of the uppermost Oldman Formation. These beds encompass less than 1.7 million years of time (6). Some of the referred specimens lack precise stratigraphic data. In particular, many specimens are recorded as coming from the “Judith River Formation”; these beds are now divided into the beds of the lower Oldman Formation and the Dinosaur Park Formation, which overlies the Oldman in the Dinosaur Provincial Park area. Both formations are part of the Belly River Group (6). Most (if not all) of these Belly River Group fossils probably come from the Dinosaur Park Formation, which is more extensively exposed and more fossiliferous than the underlying Oldman.

*Dimensions*: dimensions measured for *Hesperonychus* are lengths of the pubis, pedal phalanx II-1, and pedal phalanx II-2, and height of the articular surface for pedal phalanx II-3. Corresponding dimensions for the holotype of *Sinornithosaurus millennii* are 120 mm, 14.9 mm, 16.8 mm, and 6.8 mm, respectively.

**SI:2 Fig. 1.** Map showing localities of *Hesperonychus* holotype and referred specimens: **1**, Dinosaur Provincial Park (DPP); **2** Sandy Point; **3**, Irvine; **4**, Manyberries/Onefour, **5**, Devil’s Coulee.

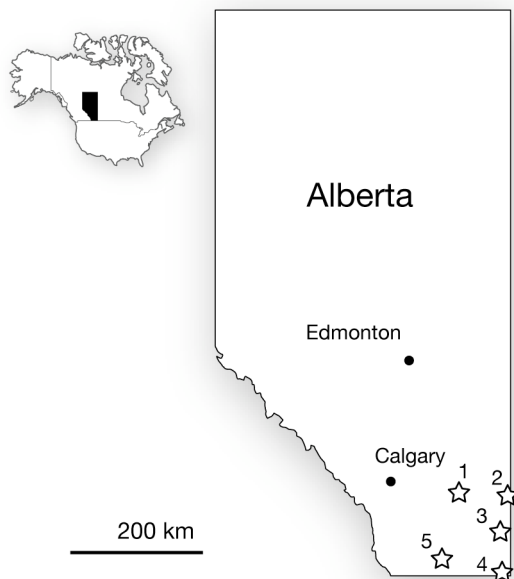

## Appendix 3: Taxa and characters used in phylogenetic analysis

### I. List of Taxa

*Archaeopteryx*  
*Sinovenator changii*  
*Byronosaurus jaffei*  
*Troodon*  
*Mahakala omnogovae*  
*Rahonavis ostromi*  
*Unenlagia comahuensis*  
*Unenlagia? paynemili*  
*Buitreraptor gonzalezorum*  
*Neuquenraptor argentinus*  
*Austroraptor cabazai*  
*Microraptor*  
*Graciliraptor lujiatunensis*  
*Shanag ashile*  
*Sinornithosaurus millenii*  
*Hesperonychus elizabethae*  
*Saurornitholestes langstoni*  
*Atrociraptor marshalli*  
*Bambiraptor feinbergi*  
*Velociraptor mongoliensis*  
*Itemirus medullaris*  
*Tsaagan mangas*  
*Adasaurus mongoliensis*  
*Deinonychus antirrhopus*  
*Dromaeosaurus albertensis*  
*Utahraptor ostrommaysi*  
*Achillobator giganticus*

### II. List of characters

#### Skull

1. Premaxilla, maxilla, and dentary bearing distinct interdental plates [0] or interdental plates absent [1] (7)
2. Premaxilla elongate [0], or body of premaxilla short, no more than 15% length of maxilla [1]
3. Premaxilla with short maxillary process [0] or elongate maxillary process separating nasal and maxilla [1] (8)
4. Premaxilla: body of premaxilla longer than tall [0] or at least as tall as long [1]
5. Nasal process of premaxilla projecting posterodorsally [0] or posteriorly [1]
6. Premaxilla with limited exposure of narial fossa on lateral surface [0] or with prominent anteroventral extension of narial fossa onto lateral surface of premaxilla [1]

7. Maxilla does not contribute to narial fossa [0] or narial fossa expanded onto anterior ramus of maxilla [1]
8. Maxilla, postantral wall concealed in lateral view [0] or caudally projecting into antorbital fenestra and exposed in lateral view [1] (9)
9. Maxilla, palatal shelf concealed in lateral view [0], or palatal shelf projecting dorsally into the antorbital fenestra and visible in lateral view [1]
10. Maxilla, promaxillary fenestra subcircular and broadly exposed in lateral view [0] or slitlike, largely concealed in the anteroventral margin of antorbital fossa [1] (10)
11. Maxilla, anterior ramus elongate, 25% or more of the length of maxilla [0] or short, less than 25% length of maxilla [1]
12. Maxilla, accessory antorbital fenestra large and subcircular [0] or small and subcircular [1] or anteroposteriorly elongate [2] UNORDERED
13. Maxilla, accessory antorbital fenestra positioned low in antorbital fossa [0] or placed dorsally in antorbital fossa [1] (12)
14. Maxilla, accessory antorbital fenestra developed as a simple perforation [0] or located in distinct fossa [1] or located in a fossa containing a deep and pitlike excavation posterodorsal to the accessory antorbital fenestra [2] UNORDERED [Modified from (12)]
15. Maxilla, labial margin smooth [0] or maxilla with a distinct lip bounding the ventral margin of the antorbital fossa [1]
16. Maxilla, anterior ramus longer than tall [0] or short, at least as tall as long [1]
17. Maxilla, interfenestral bar separating maxillary fenestra and antorbital fenestra: narrow [0] or broad [1]
18. Nasals concave in lateral view [0] or straight to convex in lateral view [1] [2]
19. Frontal, orbital margin straight or smoothly concave in dorsal view [0] or postorbital process sharply offset, and orbital margin L-shaped in dorsal view [0] (13)
20. Frontal notched to receive lacrimal: absent [0] or present [1] (13)
21. Frontal, supratemporal fossa smooth [0] or supratemporal fossa with a distinct pit [1] (13)
22. Frontal, supratemporal fossa restricted to the lateral half of the frontal [0] or supratemporal fossa extends medially [1]
23. Jugal, suborbital ramus slender [0] or dorsoventrally deep and robust [1]
24. Jugal, postorbital process slender; jugal triradiate [0] or postorbital process broad, and jugal triangular [1]
25. Quadratojugal with straight ascending ramus [0] or ascending ramus bowed anteriorly [1]
26. Quadrate shaft pierced by large foramen: present [0] or absent [1]
27. Quadrate shaft straight or weakly curved in lateral view [0] or strongly bowed anteriorly in lateral view [1]
28. Exoccipital, caudal surface with a bowl-like depression containing the exits of cranial nerves X and XII: absent [0], or present [1] (8)
29. Exoccipital, paroccipital processes of exoccipital project ventrolaterally [0] or laterally [1] [(8), polarity reversed]
30. Basioccipital tubera, caudal surfaces flat or smoothly concave [0] or basioccipital tubera with distinct, ovoid depressions on the caudal surface [1]
31. Basioccipital tubera separated by weak notch [0] or separated by a deep, broad, U-shaped ventral notch [1]
32. Basisphenoid recess with paired openings: absent [0] or present [1]
33. Prominent lateral depression of braincase bounded by otosphenoidal crest: absent [0] or present
34. Foramen magnum subcircular [0] or distinctly taller than wide [1]
35. Dentary subtriangular, with dorsal and ventral margins diverging posteriorly [0] or dentary dorsal and ventral margins subparallel [1] (13)
36. Dentary with prominent groove along the length of the lateral surface [0] or lateral groove reduced anteriorly or absent [1] (8)
37. Dentary straight or weakly curved in lateral view [0] or strongly bowed, with curved dorsal and ventral margins [1]



38. Dentary with distinct midlength constriction and terminal expansion: absent [0] or present [1]
39. Articular with tall, columnar process on retroarticular process: absent [0] or present [1]
40. Skull short [0] or elongate, at least 125% length of femur [1] (14)

### **Dentition**

41. Teeth constricted between crown and root [0] or constriction absent [1] (15)
42. Premaxillary and anterior dentary teeth unserrated [0] or bearing denticles on posterior carina [1] (8)
43. Premaxillary teeth 2-4 subequal in size [0] or second premaxillary tooth larger than third and fourth [1] (13)
44. Maxillary teeth number fewer than 20 [0] or numbering at least 20 [1] [modified from (8)]
45. Maxillary teeth strongly raked posteriorly: absent [0] or present [1] (16)
46. Maxillary teeth subequal in length along the jaw [0] or posterior maxillary teeth elongate and fanglike, approximately 200% the length of anteriormost maxillary teeth [1]
47. Maxillary and posterior dentary teeth unserrated [0] or bearing denticles on posterior carina only [1] or bearing denticles on anterior and posterior carina [2] UNORDERED [modified from (17)]
48. Maxillary and posterior dentary teeth, denticles: anterior denticles smaller than posterior denticles [0] or anterior and posterior denticles subequal in size [1] (7)
49. Anterior dentary teeth closely packed: absent [0] or present [1]

### **Axial skeleton**

50. Axis vertebra bearing short epiphyses [0] or elongate axial epiphyses that project laterally beyond postzygapophyses [1] (18)
51. Cervical vertebrae, carotid processes present [0] or carotid processes absent [1] (17)
52. Cervical vertebrae with low neural spines [0] or cervical neural spines at least as tall as long anteroposteriorly [1]
53. Dorsal vertebrae, parapophyses short [0] or borne on elongate pedicels [1] [1]
54. Dorsal vertebrae, pneumatopores absent [0] or present on dorsal centra [1] (19)
55. Dorsal vertebrae, neural spines low, height does not exceed anteroposterior length [0] or taller than long anteroposteriorly [1]
56. Dorsal vertebrae, neural arch bearing prominent anterior fossae on either side of neural canal: absent [0] or present [1]
57. Dorsal vertebrae, centra of posterior dorsals elongate [0] or short and massive, length of centrum less than diameter [1]
58. Dorsal vertebrae, distal end of neural spines transversely expanded by at least 200% to form a distinct spine table: absent [0] or present [1]
59. Sacral vertebrae, 5 vertebrae incorporated into sacrum [0] or sacrum incorporating at least 6 vertebrae [1] (10)
60. Sacral vertebrae lack pneumatopores [0] or pneumatopores present in one or more sacral vertebrae [1] (19)
61. Caudal vertebrae, distal caudal centra bearing prominent lateral depressions [0] or lateral surfaces of centra flat or convex [1]
62. Caudal vertebrae, distal caudals greatly elongated, up to 200% the length of proximal caudals [0] or moderately elongate, no more than 200% the length of the proximal caudals [1]
63. Caudal vertebrae, distal caudal vertebrae with a convex or flat dorsal surface [0] or bearing a prominent dorsal groove [1] (20)
64. Caudal vertebrae, prezygapophyses short [0] or elongate [1] or extended by ossified tendons of caudal epaxial muscles [2] (7)

## Pectoral Girdle

65. Sternal plates unossified [0] or ossified [1] [Modified from (17)]
66. Furcula, interclavicular angle less than 90° [0] or at least 90° [1]
67. Coracoid highly flexed in lateral view, with dorsal and ventral rami of coracoid forming an angle of 90°-100° [0] or coracoids weakly flexed, forming an angle larger than 100°
68. Coracoid elongate, taller than wide [0] or short, at least as wide as tall [1]

## Forelimb

69. Humerus elongate, at least 75% length of femur [0] or shortened, humerus less than 75% length of the femur [1]
70. Humerus, internal tuberosity proximodistally short [0] or proximodistally elongate, about 50% the length of deltopectoral crest [1]
71. Humerus, proximal shaft with prominent longitudinal ridge on posterior surface: absent [0] or present [1]
72. Manual phalanx I-1 strongly bowed in medial view [0], weakly curved or straight [1]
73. Manual phalanx III-1 elongate, at least 75% length of III-3: absent [0] or present [1] [modified from (21)]
74. Metacarpal I no more than 33% length of mtc II [0] or metacarpal I more than 33% length of MC II [1]
75. Manual phalanx I-1 elongate [0] or short, combined length of metacarpal I and manual phalanx I-1 < MC II [1] (21)

## Pelvic Girdle

76. Ilium, anterior wing 200% length of posterior wing [0] or short, less than twice length of posterior blade [1]
77. Ilium, end of anterior wing rounded or straight [0], or with notched cranial margin [1]
78. Ilium, cuppedicus ridge ends on pubic peduncle [0] or extends posteriorly to acetabulum [1] (22)
79. Ilium, medial antiliac shelf (22) short [0] or elongate, approaching length of posterior wing [1]
80. Ilium, posterior wing of ilium slender, shallower than anterior wing [0] or posterior wing as deep or deeper than anterior wing [1]
81. Ilium, posterior wing longer than tall [0] or posterior wing at least as tall as long [1]
82. Ilium with acuminate caudal margin [0] or brevis shelf lobate and projecting posteriorly beyond postacetabular lamina [1] or brevis shelf notched in lateral view [2] [modified from (14)]
83. Ilium, posterior wing with straight or convex dorsal margin [0] or concave dorsal margin [1] (22)
84. Ilium, pubic peduncle narrow in lateral view [0] or broad, anteroposterior width approximately 200% of height [1]
85. Pubis, distal end with prominent posterior expansion [0] distal end spatulate, both anterior and posterior expansions absent [1] or with prominent anterior and posterior expansions [2] [UNORDERED] [modified from(8)]
86. Pubis, shaft straight or gently curved [0] or distal end of shaft strongly bent posteriorly [1] (11)
87. Pubis, lateral surface of shaft smooth or bearing a ridge [0] or with enlarged tubercles or processes [1] (11)
88. Pubis, Pubic apron extends less than 50% length of pubis [0] or pubic apron elongate, at least 50% length of pubis [1] (23)
89. Ischium short, no more than 50% length of pubis [0] or elongate, more than 50% length of pubis [1]
90. Ischium, obturator process located at distal end of shaft [0] or located at midshaft [1] or proximally located [2] [ORDERED] [(8), polarity reversed]
91. Ischium, proximodorsal process present [0] or absent [1] or hypertrophied [2] UNORDERED (24)

92. Ischium with distal dorsal process prominent [0] or highly reduced or absent [1] (25)
93. Ischium, lateral ridge on shaft absent [0] or present [1] (14)
94. Ischium, obturator process elongate and spur-like [0] or broad and flange-like [1]
95. Ischium with obturator process separated from ischial shaft by caudal notch [0] or confluent [1] (10)
96. Ischium, distal end tapers to a narrow point [0] or broadly expanded, blunt or spatulate end [1]
97. Ischium, shaft mediolaterally compressed [0] or subcircular in section [1] (14)
98. Ischium, ridge on medial surface connecting proximodorsal process and iliac peduncle: absent [0], or present [1]

### Hindlimb

99. Femur with femoral head projecting dorsomedially or medially relative to shaft [0] or femoral head projects ventromedially [1]
100. Metatarsal II and phalanx II-1 articulate via ginglymoid articulation: absent [0] or present [1] (8)
101. Metatarsal II, subequal to IV in length [0] or markedly shorter than IV [1] (10)
102. Metatarsal II, distal condyles broad, subequal to III in width: absent [0] or present [1]
103. Metatarsal III, plantar surface broadly exposed [0] or metatarsal III largely covered by metatarsal III and IV in ventral view [1]
104. Metatarsal III, dorsal surface of shaft flat or rounded [0] or with prominent longitudinal sulcus [1]
105. Metatarsal IV, distal surface trochlear to planar [0] or condyle strongly ball-shaped [1]
106. Metatarsal IV, prominent flange on caudolateral surface of shaft: present [0] or highly reduced or absent [1] (26)
107. Metatarsal IV, lateral flange on proximal end of shaft: absent [0] or present [1]
108. Metatarsal IV, ventral surface with a prominent tuber proximal to distal articular surface: absent [0] or present [1]
109. Pedal phalanx II-1 elongate [0] or short and robust, shaft length does not exceed 200% the diameter of the distal condyle [1]
110. Pedal phalanx II-2 proximoventral heel: short [0] or with elongate caudal projection [1]
111. Pedal phalanx II-2 slender to moderately robust [0] or extremely massive, shaft diameter at least 50% of shaft length [1]
112. Pedal phalanx II-2 subequal to or longer than, II-1 [0] or significantly shorter than II-1 [1]
113. Pedal phalanx II-2 with deep collateral ligament pits [0] or ligament pits reduced [1]
114. Pedal phalanx II-3; lateral and medial vascular grooves at same level [0] or lateral groove dorsally displaced and medial groove ventrally displaced [1]

### Notes:

The analysis was conducted at the generic level, and so several taxa are coded from more than one species. The taxon *Archaeopteryx* includes *Archaeopteryx lithographica*, and smaller specimens that likely represent a second, small-bodied species, *Archaeopteryx recurva* (27). *Microraptor* includes the type species *Microraptor zhaoianus* as well as *Microraptor gui*. *Troodon* is coded from *Troodon* sp. from the Two Medicine Formation of Montana, *Troodon inequalis* from the Belly River Group of Alberta, and *Troodon* sp. from the Horseshoe Canyon Formation of Alberta. However, *Unenlagia comahuensis* and *Unenlagia? paynemili* differ markedly in the morphology of the humerus and ilium, raising questions about whether the two are congeneric. Therefore, these species were coded separately. *Neuquenraptor argentinus* may be synonymous with either *Unenlagia comahuensis* or *Unenlagia? paynemili*, but at present there is too little information to resolve this issue.

The taxonomy employed for this study follows previous studies (28, 29, 14) with the following amendments:

**Eudromaeosauria** is defined as the least inclusive clade containing *Saurornitholestes langstoni*, *Deinonychus antirrhopus*, *Dromaeosaurus albertensis*, and *Velociraptor mongoliensis*. The clade has been found to be monophyletic by a number of recent analyses (14, 26, 29,30).

**Saurornitholestinae** is defined as the most inclusive clade containing *Saurornitholestes langstoni* but not *Dromaeosaurus albertensis*, *Velociraptor mongoliensis*, or *Microraptor zhaoianus*. This clade is supported by the following derived characters: deep pit caudodorsal to accessory antorbital fenestra (14:2), sacral vertebrae pneumatized (60:1), ridge on medial surface of ischium ventral to proximodorsal process (98:1). Within Dromaeosauridae, characters 14 and 98 appear to be unique to this clade.



*Graciliraptor lujiatensis*

????????????????????????????????????????????????????????????0?????20????????????0????02????????????101????  
????????????????????????????????????????1111?????00000?

*Shanag ashile*

1?1????000?1111100????????????????????????0010?2?10??011!0????????????????????????????????  
????????????????????????????????????????????????????????

*Sinornithosaurus millennii*

1011??0??11111??00111??0????????????101010101001200????0??000????21?0001?010111?0  
??0??1110000000000??1??1?100??0000?

*Hesperonychus elizabethae*

????????????????????????????????????????????????????????????????????????????????????????0?  
??0001110????????????????????????????????????????

*Saurornitholestes langstoni*

1?11?000110112010?1111??110????????1110101?1000200????11111?(01)11?021?11010?????  
????????????????00111100101?0001000110?01

*Atrociraptor marshalli*

10110000110112010????????????????????1100??111010200????????????????????????????????  
????????????????????????????????????????????

*Bambiraptor feinbergi*

101100000011120101?0?1001110?010??1110?01??0101!0?1111111001100211110101100100  
00000000100011110010110001000110001

*Velociraptor mongoliensis*

10101101010100000011111010011111001110?01110002001111(01)1?11101102111111010101  
10010000200111111111000110001111110001

*Itemirus medullaris*

????????????????????????????????????1?11?00????????????????????????????????????????  
????????????????????????????????????????

*Tsaagan mangas*

?0?01101010?0000001?0111001100110101101?1110001!01?1????????????????????????????  
????????????????????????????????????

*Adasaurus mongoliensis*

1010?10?0?0??01??????11??1????????1110??1?1000?10?????1?1????????????????????1100  
10?00200?1111?110????????????????11?1??

*Deinonychus antirrhopus*

1011000001011101011?11100??1??????11101?11?010200111111011??1102??1111010101100  
0000200101111111000110001100110101

*Dromaeosaurus albertensis*

1?1????001????01??110110010010000011001?11?000210????????????????????????????  
????????????????????????1?0??1?1111111?

*Utahraptor ostrommaysi*

???100????????????????????????????????????????????????????????111????1????11101???1?02??11??????????00  
?0200?????201011?1001?000?1111?????1

*Achillobator giganticus*

1?1???0?0?0???01????????????????????????????????1??00021??11111?1???1?01????????????1100  
112002001120101111001?0?0?????11?1?

## References

1. Norell MA & Makovicky PJ (1999) Important features of the dromaeosaurid skeleton II: information from newly collected specimens of *Velociraptor mongoliensis*. *American Museum Novitates* 3282:1-45.
2. Paul GS (1988) *Predatory Dinosaurs of the World* (Simon and Schuster, New York) p 464.
3. Yalden D (1984) What size was *Archaeopteryx*? *Zoological Journal of the Linnean Society* 82:177-188.
4. Therrien F & Henderson DM (2007) My theropod is bigger than yours... or not: estimating body size from skull length in theropods. *Journal of Vertebrate Paleontology* 27(1):108-115.
5. Anderson JF, Hall-Martin A, & Russell DA (1985) Long-bone circumference and weight in mammals, birds and dinosaurs. *Journal of Zoology* 206(4):53-61.
6. Eberth DA (2005) The geology. *Dinosaur Provincial Park: a Spectacular Ancient Ecosystem Revealed*, eds Currie PJ & Koppelhus EB (Indiana University Press, Bloomington), pp 54 - 82.
7. Ostrom JH (1969) Osteology of *Deinonychus antirrhopus*, an unusual theropod from the Lower Cretaceous of Montana. *Peabody Museum of Natural History, Bulletin* 30(1 - 165).
8. Norell MA, Clark JM, & Makovicky PJ (2001) Phylogenetic relationships among coelurosaurian theropods. *New Perspectives on the Origin and Early Evolution of Birds: Proceedings of the International Symposium in Honor of John H. Ostrom*, eds Gauthier J & Gall LF (Peabody Museum of Natural History, New Haven), pp 49 - 67.
9. Novas FE, Pol D, Canale JJ, Porfiri JD, & Calvo JO (2008) A bizarre Cretaceous theropod dinosaur from Patagonia and the evolution of Gondwanan dromaeosaurids. *Proceedings of the Royal Society B*:doi:10.1098/rspb.2008.1554.
10. Holtz TR (1994) The phylogenetic position of the Tyrannosauridae: implications for theropod systematics. *Journal of Paleontology* 68(5):1100 - 1117.
11. Senter P, Barsbold R, Britt BB, & Burnham DA (2004) Systematics and evolution of Dromaeosauridae. *Bulletin of Gunma Museum of Natural History* 8:1 - 20.
12. Turner AH, Hwang SH, & Norell MA (2007) A small derived theropod from Öösh, Early Cretaceous, Baykhangor Mongolia. *American Museum Novitates* 3557:1 - 27.
13. Currie PJ (1995) New information on the anatomy and relationships of *Dromaeosaurus albertensis* (Dinosauria: Theropoda). *Journal of Vertebrate Paleontology* 15(3):576 - 591.
14. Makovicky PJ, Apestegula S, & Agnolin FL (2005) The earliest dromaeosaurid theropod from South America. *Nature* 437:1007-1011.
15. Currie PJ (1987) Bird like characteristics of the jaws and teeth of troodontid theropods (Dinosauria:Saurischia). *Journal of Vertebrate Paleontology* 7(1):72 - 81.
16. Currie PJ & Varricchio DJ (2004) A new dromaeosaurid from the Horseshoe Canyon Formation (Upper Cretaceous) of Alberta, Canada. *Feathered Dragons*, eds Currie PJ, Koppelhus EB, Shugar MA, & Wright JL (Indiana University Press, Indianapolis), pp 112 - 132.
17. Makovicky PJ & Sues H - D (1998) Anatomy and phylogenetic relationships of the theropod dinosaur *Microvenator celer* from the Lower Cretaceous of Montana. *American Museum Novitates* 3249:1 - 27.
18. Gauthier J (1986) Saurischian monophyly and the origin of birds. *Memoirs of the California Academy of Sciences* 8(1 - 55).
19. Holtz TR (1998) A new phylogeny of the carnivorous dinosaurs. *Gaia* 15:5 - 61.
20. Russell DA & Dong Z-M (1993) A nearly complete skeleton of a new troodontid dinosaur from the Early Cretaceous of the Ordos Basin, Inner Mongolia, People's Republic of China. *Canadian Journal of Earth Sciences* 30:2163-2173.
21. Xu X (2004) A new dromaeosaur (Dinosauria: Theropoda) from the Early Cretaceous Yixian



- Formation of eastern Liaoning. *Vertebrata Palasiatica* 42(2):111 - 119.
22. Novas FE (2004) Avian traits in the ilium of *Unenlagia comahuensis* (Maniraptora, Avialae). *Feathered Dragons: Studies on the Transition From Dinosaurs to Birds*, eds Currie PJ, Koppelhus EB, Shugar MA, & Wright JL (Indiana University Press, Bloomington), pp 301-342.
  23. Novas FE (1996) Alvarezsauridae, Cretaceous basal birds from Patagonia and Mongolia. *Proceedings of the Gondwanan Dinosaurs Symposium. Memoirs of the Queensland Museum* 39, eds Novas FE & Molnar RE), pp 675-702.
  24. Chiappe LM, Ji S - A, Ji Q, & Norell MA (1999) Anatomy and systematics of Confuciusornithidae (Theropoda: Aves) from the late Mesozoic of northeastern China. *Bulletin of the American Museum of Natural History* 242:1 - 89.
  25. Forster CA, Sampson SD, Chiappe LM, & Krause DW (1998) The theropodan ancestry of birds: new evidence from the Late Cretaceous of Madagascar. *Science* 279:1915 - 1919.
  26. Novas FE & Pol D (2005) New evidence of deinonychosaurian dinosaurs from the Late Cretaceous of Patagonia. *Nature* 433:858-861.
  27. Howgate ME (1984) The teeth of *Archaeopteryx* and a reinterpretation of the Eichstätt specimen. *Zoological Journal of the Linnean Society* 82(159 - 175).
  28. Sereno PC (1998) A rationale for phylogenetic definitions, with application to the higher - level taxonomy of Dinosauria. *Neues Jahrbuch für Geologie und Paläontologie Abhandlungen* 210:41 - 83.
  29. Turner AH, Pol D, Clarke J, Erickson GM, & Norell M (2007) A basal dromaeosaurid and size evolution preceding avian flight. *Science* 317:1378-1381.
  30. Norell MA, *et al.* (2006) A new dromaeosaurid theropod from Ukhaa Tolgod (Ömnögov, Mongolia). *American Museum Novitates* 3545:51.
